# Supplementary material for: Inflammation impacts androgen receptor signaling in basal prostate stem cells through interleukin 1 receptor antagonist
Source: PubMed Central journal article supplement — Commun Biol. 2024 Oct 25;7:1390. doi: 10.1038/s42003-024-07071-y (PMC11511867; doi:10.1038/s42003-024-07071-y), 2024-10-25
Supplement: 42003_2024_7071_MOESM1_ESM.pdf [file 42003_2024_7071_MOESM1_ESM.pdf]

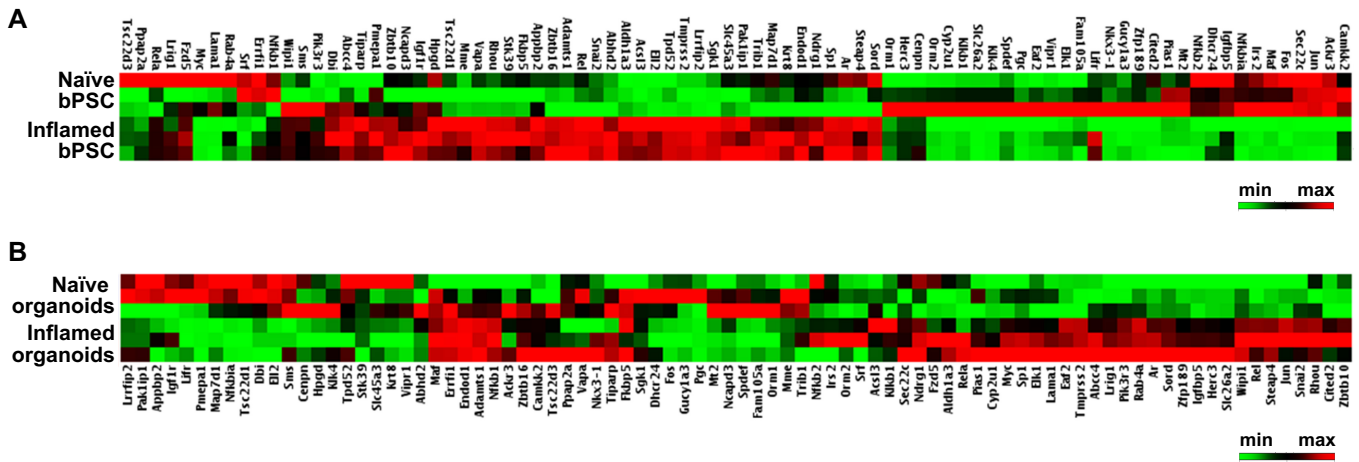

**Supplementary Figure 1. Heatmaps of AR signaling target genes as analyzed with PCR Arrays. (A)** Naive and inflamed bPSC (All groups, n=3). **(B)** Naive and inflamed organoids (All groups, n=3).

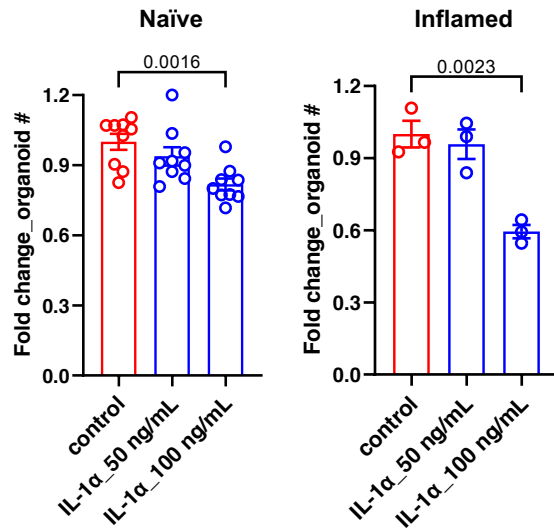

**Supplementary Figure 2. IL-1 $\alpha$  inhibits organoid formation with both naïve and inflamed bPSC.** Naïve groups, n=9; Inflamed groups, n=3. Data presented in this figure are mean  $\pm$  SEM.

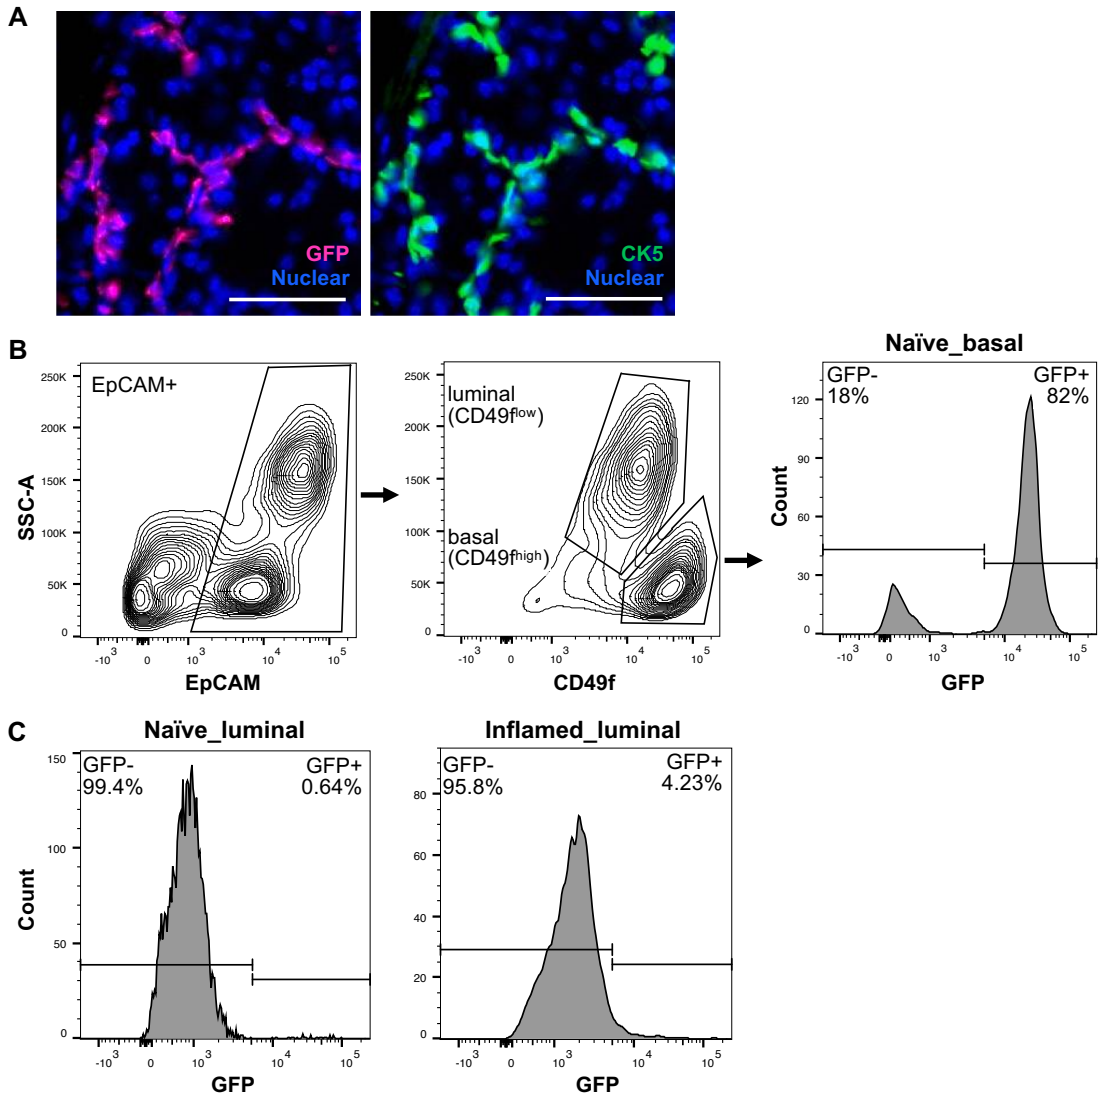

**Supplementary Figure 3. GFP induction in basal prostate epithelium and presence of GFP+ cells in luminal epithelium after inflammation. (A)** Tamoxifen treatment induced GFP in CK5+ basal epithelial cells as shown with immunofluorescent staining (Scale bar, 50  $\mu$ m). **(B)** Flow cytometry confirmed the induction of GFP in EpCAM+/CD49f<sup>high</sup> basal cells. **(C)** GFP+ cells within the luminal epithelial population (EpCAM+/CD49f<sup>low</sup>) were increased with inflammation.

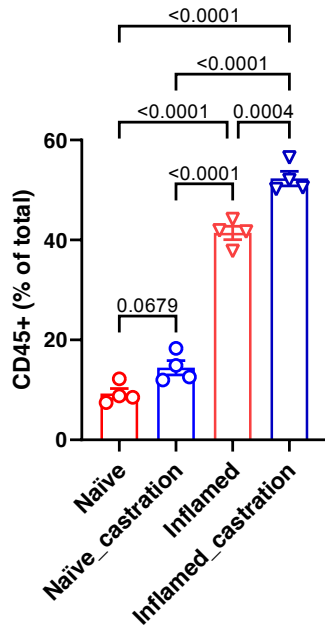

**Supplementary Figure 4. CD45+ leukocyte infiltration was increased in inflamed POET3 prostates with or without castration.** All groups, n=4. Data presented in this figure are mean  $\pm$  SEM.



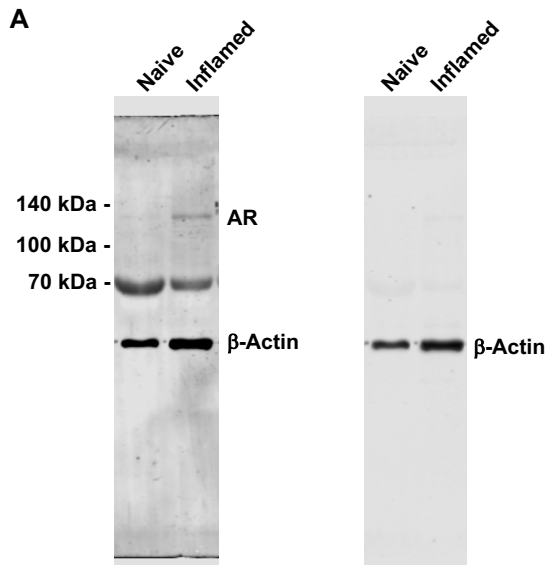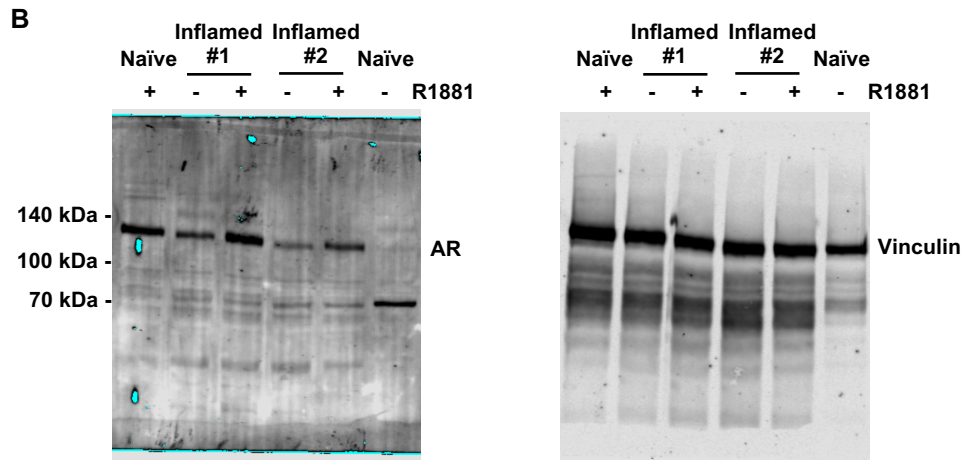

Supplementary Figure 5. Uncropped Western blot images for Fig. 1C (A) and 1F (B).

**Supplementary Table 1. AR target genes upregulated in inflamed bPSC**

| Gene Symbol    | Fold Regulation | p-value  | RefSeq       |
|----------------|-----------------|----------|--------------|
| <i>Aldh1a3</i> | 13.4233         | 0.000939 | NM_053080    |
| <i>Pmepa1</i>  | 9.6242          | 0.004442 | NM_022995    |
| <i>Tmprss2</i> | 8.7746          | 0.000045 | NM_015775    |
| <i>Adamts1</i> | 7.0128          | 0.000843 | NM_009621    |
| <i>Lrrfip2</i> | 6.9967          | 0.000012 | NM_027742    |
| <i>Abhd2</i>   | 6.8369          | 0.00086  | NM_018811    |
| <i>Mme</i>     | 5.9932          | 0.004442 | NM_008604    |
| <i>Acsl3</i>   | 5.8835          | 0.000531 | NM_001033606 |
| <i>Sgk1</i>    | 4.5736          | 0.000357 | NM_011361    |
| <i>Rel</i>     | 3.9086          | 0.044072 | NM_009044    |
| <i>Eil2</i>    | 3.2944          | 0.000446 | NM_138953    |
| <i>Vapa</i>    | 3.1895          | 0.002297 | NM_013933    |
| <i>Zbtb16</i>  | 2.8879          | 0.002752 | NM_001033324 |
| <i>Fkbp5</i>   | 2.8089          | 0.035092 | NM_010220    |
| <i>Slc45a3</i> | 2.8024          | 0.009049 | NM_145977    |
| <i>Map7d1</i>  | 2.7959          | 0.044072 | NM_144941    |
| <i>Endod1</i>  | 2.7638          | 0.044739 | NM_028013    |
| <i>Tsc22d1</i> | 2.6208          | 0.006968 | NM_009366    |
| <i>Tpd52</i>   | 2.3674          | 0.000125 | NM_009412    |
| <i>Tiparp</i>  | 2.2658          | 0.038166 | NM_178892    |
| <i>Pak1ip1</i> | 2.2553          | 0.000012 | NM_026550    |
| <i>Stk39</i>   | 2.0753          | 0.008354 | NM_016866    |
| <i>Snai2</i>   | 2.0658          | 0.001819 | NM_011415    |

**Supplementary Table 2. AR target genes upregulated in inflamed organoids**

| <b>Gene Symbol</b> | <b>Fold Regulation</b> | <b>p-value</b> | <b>RefSeq</b> |
|--------------------|------------------------|----------------|---------------|
| <i>Igfbp5</i>      | 9.9365                 | 0.007704       | NM_010518     |
| <i>Slc26a2</i>     | 5.8675                 | 0.016003       | NM_010513     |
| <i>Steap4</i>      | 5.2394                 | 0.00112        | NM_013584     |
| <i>Ar</i>          | 3.8444                 | 0.002925       | NM_013476     |
| <i>Zfp189</i>      | 2.6197                 | 0.018571       | NM_145547     |
| <i>Sord</i>        | 2.4051                 | 0.006992       | NM_019928     |
| <i>Jun</i>         | 2.3995                 | 0.014287       | NM_010591     |
| <i>Lama1</i>       | 2.2544                 | 0.034606       | NM_008480     |
| <i>Cited2</i>      | 2.1377                 | 0.031692       | NM_010828     |
