# Supplementary material for: Inflammation impacts androgen receptor signaling in basal prostate stem cells through interleukin 1 receptor antagonist
Source: PubMed Central journal article supplement — Commun Biol. 2024 Oct 25;7:1390. doi: 10.1038/s42003-024-07071-y (PMC11511867; doi:10.1038/s42003-024-07071-y), 2024-10-25
Supplement: 42003_2024_7071_MOESM2_ESM.pdf [file 42003_2024_7071_MOESM2_ESM.pdf]

# Description of Additional Supplementary Files

**File name:** Supplementary Data 1

**Description:** Genes significantly regulated in inflamed bPSC as analyzed with scRNA-seq

**File name:** Supplementary Data 2

**Description:** Differentially accessible chromatin regions and their AR binding status

**File name:** Supplementary Data 3

**Description:** The source data behind the figures in the paper
